# Supplementary material for: Molecular Determinants of Selectivity in Disordered Complexes May Shed Light on Specificity in Protein Condensates
Source: MDPI journal article supplement (doi:10.3390/biom12010092), 2022-01-06
Supplement: s1 [file s1]

# Supplementary Material

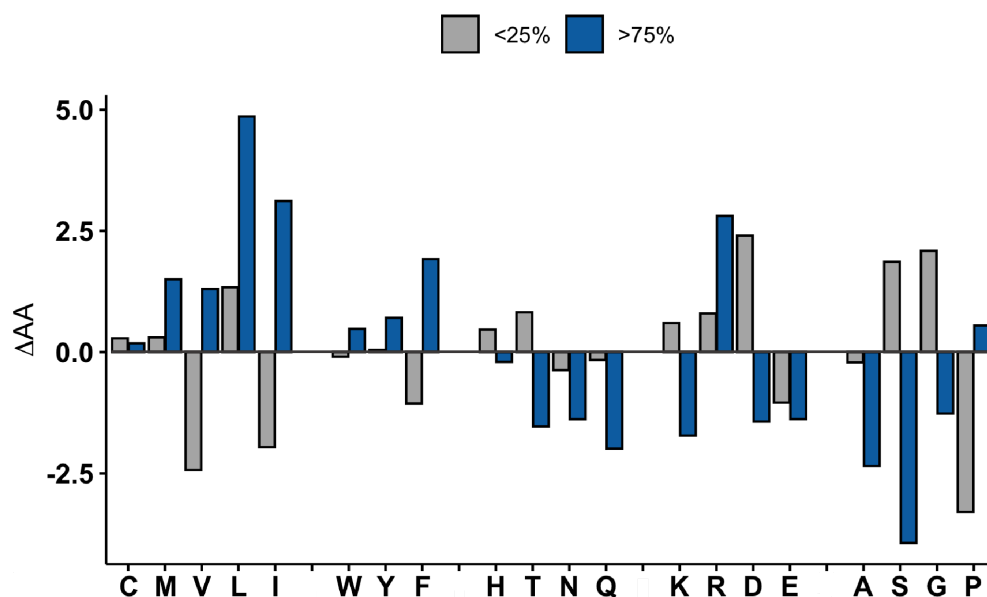

**Figure S1.** Difference in amino acid composition of droplet-driving proteins and disordered proteins in the DisProt database. (version 8.2) [1]. Difference in composition is shown for residues, which establish persisting ( $f_c = N_c/N_{TOTAL} \geq 0.75$ , blue) and transient ( $f_c = N_c/N_{TOTAL} \leq 0.25$ , gray) contacts with the partner. Amino acids are grouped as hydrophobic, aromatic, polar and aggregation promoting, charged and disorder-promoting residues. Residues establishing persisting contacts are depleted in disorder-promoting residues as compared to the DisProt database.

**Table S1.** Datasets of disordered protein assemblies.

| UniProt | Dataset | PDB Chain | Number of Models | Interface Length | FuzDB ID |
|---------|---------|-----------|------------------|------------------|----------|
| O75928  | D_exp   | 2asq_B    | 10               | 14               | FC00128  |
| P01106  | D_exp   | 1mv0_A    | 20               | 13               | FC00074  |
| P03069  | D_exp   | 2lpb_B    | 13               | 28               | FC00061  |
| P03069  | D_exp   | 2g9j_A    | 10               | 20               | FC00289  |
| P03069  | D_exp   | 2g9j_B    | 10               | 20               | FC00289  |
| P04050  | D_exp   | 2l0i_B    | 10               | 9                |          |
| P04050  | D_exp   | 5lvf_B    | 20               | 16               |          |
| P04050  | D_exp   | 5m9d_B    | 20               | 16               |          |
| P04637  | D_exp   | 2l14_B    | 20               | 38               | FC00084  |
| P04637  | D_exp   | 1jsp_A    | 20               | 11               | FC00114  |
| P04637  | D_exp   | 1dt7_X    | 40               | 13               |          |
| P04637  | D_exp   | 1dt7_Y    | 40               | 13               |          |
| P04637  | D_exp   | 1hs5_A    | 20               | 26               |          |
| P04637  | D_exp   | 1hs5_B    | 20               | 26               |          |
| P04637  | D_exp   | 2gs0_B    | 20               | 13               |          |
| P04637  | D_exp   | 2ly4_B    | 10               | 39               |          |
| P04637  | D_exp   | 2mwo_B    | 20               | 15               |          |
| P04637  | D_exp   | 2mwp_B    | 20               | 12               |          |

| P06241 | D_exp  | 2mrk_B | 27 | 10 | FC00122          |
|--------|--------|--------|----|----|------------------|
| P10636 | D_exp  | 1i8h_A | 10 | 13 | FC00131          |
| P12978 | D_exp  | 2mkr_B | 20 | 9  | FC00175          |
| P24928 | D_exp  | 2lto_B | 20 | 11 | FC00149          |
| P51532 | D_exp  | 6bgh_B | 20 | 12 | FC00119          |
| Q04206 | D_exp  | 2lsp_A | 20 | 13 | FC00111          |
| Q04206 | D_exp  | 5urn_B | 20 | 20 | FC00112          |
| Q06787 | D_exp  | 2la5_B | 10 | 17 | FC00153          |
| Q13094 | D_exp  | 2ror_B | 20 | 14 |                  |
| Q6VMQ6 | D_exp  | 2rpq_B | 20 | 11 | FC00121          |
| Q9BZB8 | D_exp  | 2n1o_B | 19 | 8  | FC00143          |
| O43524 | D_pred | 6mnl_A | 20 | 16 | FC00164          |
| O75496 | D_pred | 2lp0_B | 10 | 18 | FC00150          |
| P02452 | D_pred | 2llp_A | 30 | 16 | FC00151          |
| P02452 | D_pred | 2llp_B | 30 | 16 | FC00151          |
| P02452 | D_pred | 2llp_C | 30 | 16 | FC00151          |
| P04608 | D_pred | 6mce_B | 10 | 17 | FC00166          |
| P04608 | D_pred | 6mcf_B | 10 | 15 | FC00166          |
| P06876 | D_pred | 2agh_A | 20 | 17 | FC00126          |
| P06876 | D_pred | 1sb0_B | 20 | 21 |                  |
| P07174 | D_pred | 2mic_B | 10 | 22 | FC00249          |
| P07276 | D_pred | 2lox_B | 20 | 19 | FC00178          |
| P13051 | D_pred | 1dpu_B | 30 | 13 | FC00190          |
| P14737 | D_pred | 1fhr_P | 20 | 7  | FC00189          |
| P14737 | D_pred | 1k2n_P | 20 | 9  | FC00189          |
| P14737 | D_pred | 1k3n_B | 20 | 8  | FC00189          |
| P14737 | D_pred | 1k3q_B | 20 | 10 | FC00189          |
| P15381 | D_pred | 6ctb_B | 4  | 19 |                  |
| P16220 | D_pred | 2lxt_C | 20 | 20 | FC00152, FC00259 |
| P17679 | D_pred | 1y0j_A | 20 | 18 | FC00296          |
| P17679 | D_pred | 2l5e_B | 20 | 6  | FC00297          |
| P19429 | D_pred | 1lxf_I | 30 | 15 | FC00305          |
| P19429 | D_pred | 1mxl_I | 40 | 15 | FC00305          |
| P19429 | D_pred | 1ozs_B | 30 | 20 | FC00305          |
| P19429 | D_pred | 2kgb_I | 20 | 18 | FC00305          |
| P19429 | D_pred | 2krd_I | 20 | 16 | FC00305          |
| P19429 | D_pred | 2l1r_B | 20 | 20 | FC00305          |
| P19429 | D_pred | 2mzp_I | 20 | 23 | FC00305          |
| P22059 | D_pred | 2rr3_B | 20 | 36 | FC00169          |
| P26675 | D_pred | 1aze_B | 10 | 9  | FC00324          |
| P29474 | D_pred | 2mg5_B | 20 | 16 | FC00242          |
| P29474 | D_pred | 2n8j_B | 20 | 22 | FC00242          |
| P30311 | D_pred | 1i8g_A | 10 | 9  | FC00314          |
| P34217 | D_pred | 2a0t_B | 20 | 9  | FC00186          |
| P37088 | D_pred | 2m3o_P | 15 | 11 | FC00176          |
| P37840 | D_pred | 2m55_B | 20 | 18 |                  |
| P42226 | D_pred | 5nwm_B | 20 | 30 | FC00199          |
| P46108 | D_pred | 2ms4_B | 20 | 9  | FC00163          |
| P50542 | D_pred | 4bxu_B | 10 | 11 | FC00168          |

|        |        |        |    |    |                  |
|--------|--------|--------|----|----|------------------|
| P53632 | D_pred | 2mow_B | 20 | 12 | FC00124          |
| P55036 | D_pred | 1uel_B | 20 | 26 | FC00154          |
| Q00416 | D_pred | 6gc3_B | 20 | 12 |                  |
| Q00560 | D_pred | 2bbu_B | 20 | 15 | FC00293          |
| Q01831 | D_pred | 2rvb_A | 20 | 37 | FC00229          |
| Q02384 | D_pred | 1gbr_B | 29 | 15 | FC00317          |
| Q03164 | D_pred | 2lxs_B | 20 | 19 | FC00125          |
| Q03164 | D_pred | 2lxt_B | 20 | 19 | FC00125, FC00259 |
| Q03164 | D_pred | 2agh_C | 20 | 30 | FC00126          |
| Q12983 | D_pred | 2j5d_A | 16 | 37 | FC00183          |
| Q12983 | D_pred | 2j5d_B | 16 | 37 | FC00183          |
| Q13153 | D_pred | 1zsg_B | 30 | 21 | FC00129          |
| Q13351 | D_pred | 2l2i_B | 20 | 26 |                  |
| Q15054 | D_pred | 2n1g_B | 20 | 15 | FC00172          |
| Q15116 | D_pred | 6r5g_B | 10 | 11 | FC00208          |
| Q1WCB7 | D_pred | 2khs_B | 20 | 31 | FC00274          |
| Q3UND0 | D_pred | 1m0v_B | 20 | 7  | FC00308          |
| Q60787 | D_pred | 2eu0_B | 20 | 6  | FC00185          |
| Q77YH0 | D_pred | 2ihx_A | 20 | 45 | FC00284          |
| Q79994 | D_pred | 484d_A | 22 | 17 | FC00225          |
| Q8WWN8 | D_pred | 2lnw_B | 20 | 9  | FC00263          |
| Q96G27 | D_pred | 1k5r_B | 10 | 10 | FC00311          |
| Q96PU5 | D_pred | 2mpt_B | 20 | 12 | FC00174          |
| Q96QB1 | D_pred | 2loz_B | 10 | 14 | FC00262          |
| Q96QT6 | D_pred | 2l9s_A | 20 | 33 | FC00181          |
| Q96RL1 | D_pred | 2n9e_A | 20 | 10 | FC00240          |
| Q96T88 | D_pred | 5iay_B | 20 | 13 | FC00120          |
| Q99075 | D_pred | 2m8s_B | 18 | 10 | FC00147          |
| Q9BZ95 | D_pred | 2nd1_B | 20 | 13 | FC00141          |
| Q9H211 | D_pred | 2le8_B | 19 | 23 | FC00180          |
| Q9QZS2 | D_pred | 2mp2_C | 10 | 25 | FC00123, FC00146 |
| O00418 | SDA    | 5j8h_B | 20 | 27 | FC00167, FC00198 |
| O24165 | SDA    | 2g46_C | 20 | 13 | FC00290          |
| O24165 | SDA    | 2g46_D | 20 | 13 | FC00290          |
| O35718 | SDA    | 2jz3_A | 20 | 15 | FC00278          |
| O95630 | SDA    | 5ixf_B | 10 | 14 | FC00219          |
| P00452 | SDA    | 1qfn_B | 20 | 18 | FC00303          |
| P00634 | SDA    | 5jtm_E | 20 | 25 | FC00202          |
| P00634 | SDA    | 5jtm_F | 20 | 25 | FC00202          |
| P00634 | SDA    | 5jtm_G | 20 | 25 | FC00202          |
| P00634 | SDA    | 5jtm_H | 20 | 25 | FC00202          |
| P00634 | SDA    | 5jto_E | 20 | 40 | FC00202          |
| P00634 | SDA    | 5jto_F | 20 | 40 | FC00202          |
| P00634 | SDA    | 5jto_G | 20 | 40 | FC00202          |
| P00634 | SDA    | 5jto_H | 20 | 40 | FC00202          |
| P00634 | SDA    | 5jtp_E | 20 | 22 | FC00202          |
| P00634 | SDA    | 5jtp_F | 20 | 22 | FC00202          |
| P00634 | SDA    | 5jtp_G | 20 | 22 | FC00202          |
| P00634 | SDA    | 5jtp_H | 20 | 22 | FC00202          |

|        |     |        |    |    |
|--------|-----|--------|----|----|
| P01308 | SDA | 1a7f_A | 20 | 21 |
| P01308 | SDA | 1ai0_A | 10 | 21 |
| P01308 | SDA | 1ai0_I | 10 | 21 |
| P01308 | SDA | 1aiy_A | 10 | 21 |
| P01308 | SDA | 1aiy_G | 10 | 21 |

---

|        |     |        |    |    |
|--------|-----|--------|----|----|
| P01308 | SDA | 1hiq_A | 10 | 21 |
| P01308 | SDA | 1hiq_B | 10 | 30 |
| P01308 | SDA | 1his_A | 15 | 21 |
| P01308 | SDA | 1his_B | 15 | 25 |
| P01308 | SDA | 1hit_A | 9  | 21 |
| P01308 | SDA | 1hit_B | 9  | 23 |
| P01308 | SDA | 1hui_A | 25 | 21 |
| P01308 | SDA | 1hui_B | 25 | 26 |
| P01308 | SDA | 1jco_A | 25 | 21 |
| P01308 | SDA | 1jco_B | 25 | 27 |
| P01308 | SDA | 1mhi_A | 20 | 21 |
| P01308 | SDA | 1mhi_B | 20 | 30 |
| P01308 | SDA | 1mhj_A | 20 | 21 |
| P01308 | SDA | 1sf1_A | 15 | 20 |
| P01308 | SDA | 1vkt_A | 10 | 20 |
| P01308 | SDA | 1xgl_A | 10 | 20 |
| P01308 | SDA | 1xgl_B | 10 | 26 |
| P01308 | SDA | 2h67_A | 20 | 21 |
| P01308 | SDA | 2hh4_A | 20 | 21 |
| P01308 | SDA | 2m2p_A | 30 | 21 |
| P01308 | SDA | 2mpg_A | 35 | 21 |
| P01308 | SDA | 2mpg_B | 35 | 28 |
| P01308 | SDA | 2mpi_A | 18 | 18 |
| P01308 | SDA | 2mpi_B | 18 | 22 |
| P01308 | SDA | 2rn5_B | 50 | 32 |
| P01308 | SDA | 5mwq_B | 20 | 32 |
| P01317 | SDA | 5miz_A | 10 | 19 |
| P01317 | SDA | 5miz_B | 10 | 22 |
| P01317 | SDA | 6kh9_A | 10 | 21 |
| P01317 | SDA | 6kh9_B | 10 | 29 |
| P01317 | SDA | 6kha_A | 10 | 21 |
| P01317 | SDA | 6kha_B | 10 | 30 |
| P02710 | SDA | 1abt_B | 4  | 6  |
| P02710 | SDA | 1idh_B | 20 | 12 |
| P02710 | SDA | 1lxg_B | 10 | 13 |
| P02829 | SDA | 2lsv_B | 20 | 7  |
| P03079 | SDA | 1aou_P | 22 | 10 |
| P04486 | SDA | 2k2u_B | 20 | 20 |
| P04626 | SDA | 1mw4_B | 10 | 9  |
| P04626 | SDA | 2l4k_B | 10 | 10 |
| P05866 | SDA | 1etg_B | 19 | 21 |
| P05866 | SDA | 1ull_B | 7  | 16 |
| P06492 | SDA | 2phe_C | 10 | 26 |
| P06492 | SDA | 2phg_B | 10 | 26 |

---

FC00210  
FC00210  
FC00210  
FC00210  
FC00210  
FC00210  
FC00327  
FC00327  
FC00328  
FC00260  
FC00192  
FC00275  
FC00187  
FC00187  
FC00318  
FC00318  
FC00050, FC00171  
FC00170

|        |     |        |    |    |         |
|--------|-----|--------|----|----|---------|
| P07243 | SDA | 1nyb_A | 15 | 17 | FC00306 |
| P08050 | SDA | 2n8t_B | 10 | 13 | FC00241 |
| P0AEY0 | SDA | 5jtg_E | 20 | 42 | FC00218 |
| P0AEY0 | SDA | 5jtg_F | 20 | 42 | FC00218 |
| P0AEY0 | SDA | 5jtr_E | 20 | 40 | FC00218 |
| P0AEY0 | SDA | 5jtr_F | 20 | 40 | FC00218 |
| P0AEY0 | SDA | 5jtr_G | 20 | 40 | FC00218 |

|        |     |        |    |    |                  |
|--------|-----|--------|----|----|------------------|
| P0AEY0 | SDA | 5jtr_H | 20 | 40 | FC00218          |
| P10997 | SDA | 5k5g_A | 10 | 21 | FC00217          |
| P12493 | SDA | 2mgu_M | 20 | 36 | FC00205, FC00252 |
| P14736 | SDA | 2m14_B | 20 | 14 | FC00256          |
| P18683 | SDA | 1hji_B | 20 | 14 | FC00316          |
| P19483 | SDA | 2jmx_B | 30 | 22 | FC00283          |
| P19564 | SDA | 1biv_B | 5  | 17 | FC00322          |
| P20366 | SDA | 2ks9_B | 5  | 10 | FC00272          |
| P20366 | SDA | 2ksa_B | 5  | 9  | FC00272          |
| P20366 | SDA | 2ksb_B | 5  | 11 | FC00272          |
| P21698 | SDA | 2n0y_B | 20 | 20 | FC00246          |
| P22770 | SDA | 1kc4_B | 10 | 11 | FC00310          |
| P24565 | SDA | 1pnb_A | 10 | 30 | FC00304          |
| P25024 | SDA | 1ilp_C | 20 | 16 | FC00313          |
| P26554 | SDA | 2m3m_B | 20 | 11 | FC00254          |
| P26715 | SDA | 2yu7_B | 20 | 13 |                  |
| P26729 | SDA | 1bon_B | 10 | 22 | FC00321          |
| P29559 | SDA | 1wco_N | 20 | 16 | FC00299          |
| P30989 | SDA | 2lyw_A | 10 | 24 | FC00257, FC00258 |
| P30990 | SDA | 2lyw_B | 10 | 13 | FC00257, FC00258 |
| P35228 | SDA | 5tp6_B | 20 | 25 | FC00197, FC00216 |
| P37107 | SDA | 2hug_B | 20 | 14 | FC00285          |
| P38862 | SDA | 2li5_B | 19 | 31 | FC00264          |
| P48025 | SDA | 2lct_B | 20 | 13 | FC00152          |
| P52907 | SDA | 1mq1_C | 17 | 12 | FC00158          |
| P52907 | SDA | 1mq1_D | 17 | 12 | FC00158          |
| P55284 | SDA | 2koh_B | 20 | 12 | FC00182          |
| P55957 | SDA | 1zy3_B | 10 | 20 | FC00294          |
| P58928 | SDA | 4b1q_P | 20 | 6  | FC00224          |
| P61073 | SDA | 2k04_B | 20 | 38 | FC00277          |
| P61073 | SDA | 2k04_D | 20 | 37 | FC00277          |
| P61073 | SDA | 2k05_B | 20 | 38 | FC00277          |
| P61073 | SDA | 2k05_D | 20 | 38 | FC00277          |
| P61073 | SDA | 2n55_B | 20 | 40 | FC00277          |
| P61830 | SDA | 2rnw_B | 20 | 13 | FC00233          |
| P61830 | SDA | 2rnw_B | 20 | 13 | FC00233          |
| P61830 | SDA | 2rsn_B | 20 | 17 | FC00234          |
| P68249 | SDA | 2h3s_A | 20 | 7  | FC00287          |
| P68249 | SDA | 2h3t_B | 20 | 7  | FC00287          |
| P68249 | SDA | 2h4b_A | 20 | 8  | FC00287          |
| P68249 | SDA | 2h4b_B | 20 | 8  | FC00287          |
| P68431 | SDA | 6e83_A | 20 | 8  | FC00115          |

|        |     |        |    |    |                  |
|--------|-----|--------|----|----|------------------|
| P68431 | SDA | 6e86_A | 20 | 6  | FC00115          |
| P68431 | SDA | 2m0o_B | 20 | 11 | FC00116          |
| P68431 | SDA | 2lgg_B | 20 | 12 | FC00117          |
| P68431 | SDA | 4bd3_B | 10 | 11 | FC00118          |
| P68433 | SDA | 1guw_B | 25 | 18 | FC00159          |
| P84092 | SDA | 6rh6_B | 30 | 15 | FC00207          |
| P84233 | SDA | 2l12_B | 20 | 15 | FC00206          |
| Q07794 | SDA | 6f0y_B | 10 | 14 | FC00201          |
| Q32PK0 | SDA | 2fci_B | 16 | 13 | FC00292          |
| <hr/>  |     |        |    |    |                  |
| Q3BDD9 | SDA | 2l3r_B | 15 | 11 | FC00266          |
| Q53971 | SDA | 1o9a_B | 15 | 24 |                  |
| Q61036 | SDA | 1ees_B | 20 | 46 | FC00132, FC00319 |
| Q8CVI4 | SDA | 2vda_B | 10 | 28 | FC00228          |
| Q8IVP5 | SDA | 2n9x_B | 20 | 17 | FC00239          |
| Q8JJY9 | SDA | 2kqf_B | 10 | 13 |                  |
| Q92133 | SDA | 2l1b_B | 20 | 15 | FC00269          |
| Q9BML6 | SDA | 5x9x_B | 20 | 30 |                  |
| Q9BML7 | SDA | 5x9x_A | 20 | 29 |                  |
| Q9R9T7 | SDA | 2jxh_A | 30 | 34 | FC00280          |
| Q9R9T7 | SDA | 2jxh_B | 30 | 34 | FC00280          |

**Uniprot:** Uniprot identifier of the protein. **Dataset:** classification, D\_exp: proteins, which were observed to drive formation of condensates, D\_pred: proteins, which were predicted to drive condensate formation using the FuzDrop method, SDA: specific disordered assemblies. **PDB and chain:** PDB identifier of the complex structure and chain identifier for the disordered/droplet-driving partner. **Number of models:** the number of conformations deposited in the NMR ensemble. **Inter-face length:** the number of amino acid residues, which are in contact with the partner. **FuzDB:** Identifier in FuzDB, data- base of Fuzzy interactions (fuzdb.org [2]).

## Reference

1. Hatos, A.; Hajdu-Soltesz, B.; Monzon, A.M.; Palopoli, N.; Alvarez, L.; Aykac-Fas, B.; Bassot, C.; Benitez, G.I.; Bevilacqua, M.; Chasapi, A.; et al. DisProt: Intrinsic protein disorder annotation in 2020. *Nucleic Acids Res.* **2020**, *48*, D269–D276. <https://doi.org/10.1093/nar/gkz975>.
2. Hatos, A.; Monzon, A.M.; Tosatto, S.C.E.; Piovesan, D.; Fuxreiter, M. FuzDB: A new phase in understanding fuzzy interactions. *Nucleic Acids Res.* **2021**. <https://doi.org/10.1093/nar/gkab1060>.
